# Supplementary material for: Synthesis of Nitric Oxide Donors Derived from Piloty’s Acid and Study of Their Effects on Dopamine Secretion from PC12 Cells
Source: MDPI journal article supplement (doi:10.3390/ph10030074), 2017-09-05
Supplement: s1 [file s1]

# Synthesis of Nitric Oxide Donors Derived from Piloty's Acid and Study of their Effects on Dopamine Secretion from PC12 cells

Daniele Sanna <sup>1</sup>, Gaia Rocchitta <sup>2</sup>, Maria Serra <sup>1</sup>, Marcello Abbondio <sup>3</sup>, Pier Andrea Serra <sup>2,\*</sup>, Rossana Migheli <sup>2</sup>, Lidia De Luca <sup>4</sup>, Eugenio Garribba <sup>4,\*</sup> and Andrea Porcheddu <sup>5,\*</sup>

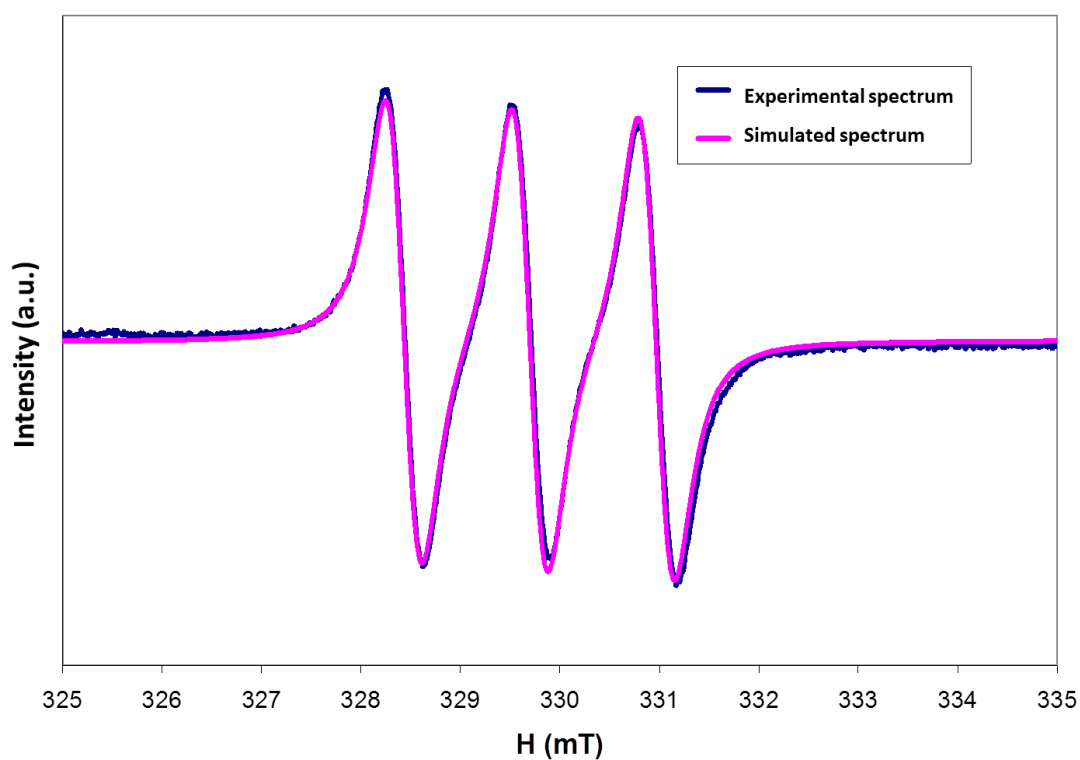

**Figure S1.** Experimental (in blue) and simulated (in pink) spectra of the species  $\text{Fe}(\text{MGD})_2(\text{NO})$ , obtained after the interaction of NO with the spin trapped  $\text{Fe}(\text{MGD})_2$ .

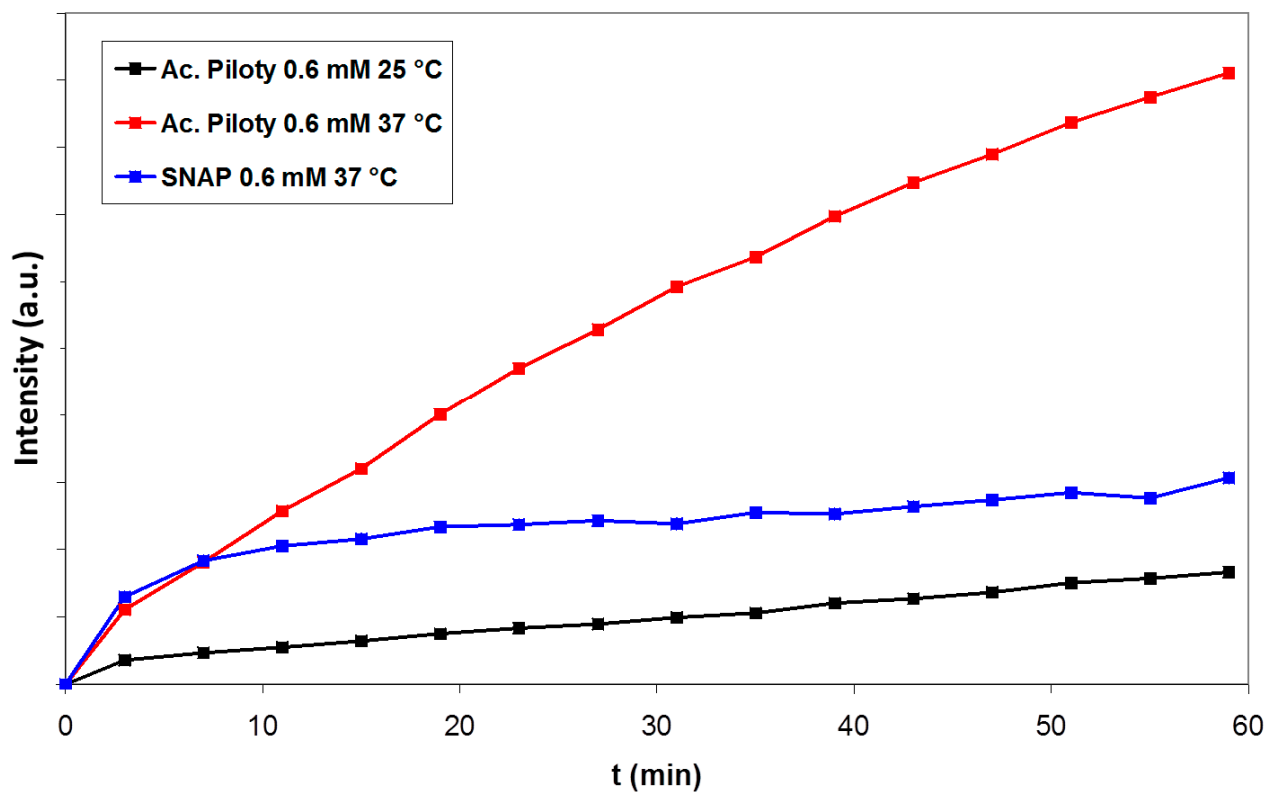

**Figure S2.** EPR intensity of the species  $\text{Fe}(\text{MGD})_2(\text{NO})$  (measured in arbitrary units) as a function of the time for Piloty's acid (at 25 and 37 °C) and SNAP (at 37 °C).

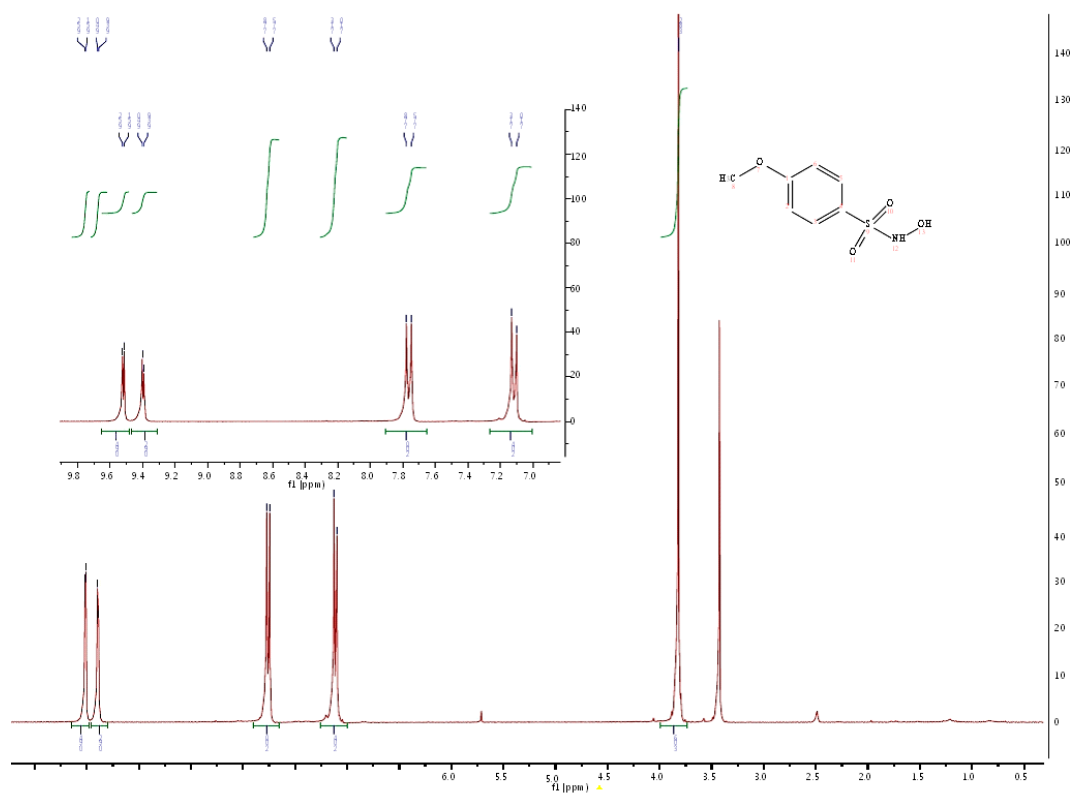

**Figure S3.**  $^1\text{H}$  NMR of N-hydroxy-4-methoxybenzenesulfonamide.

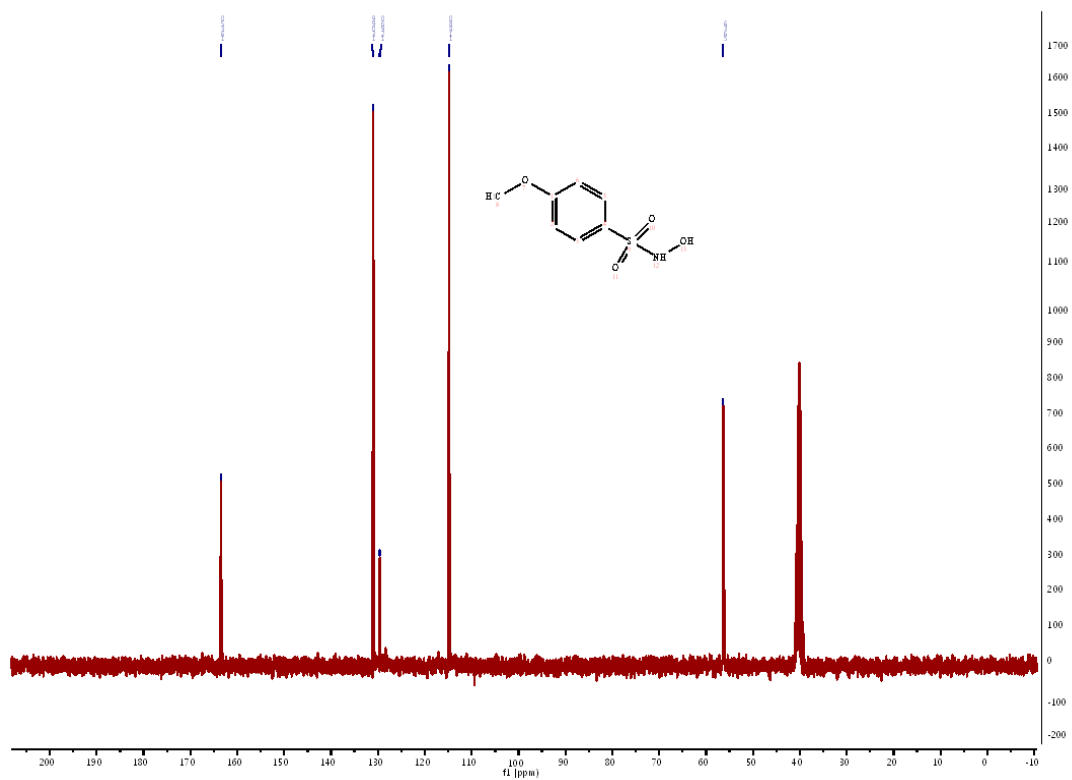

**Figure S4.**  $^{13}\text{C}$  NMR of N-hydroxy-4-methoxybenzenesulfonamide.

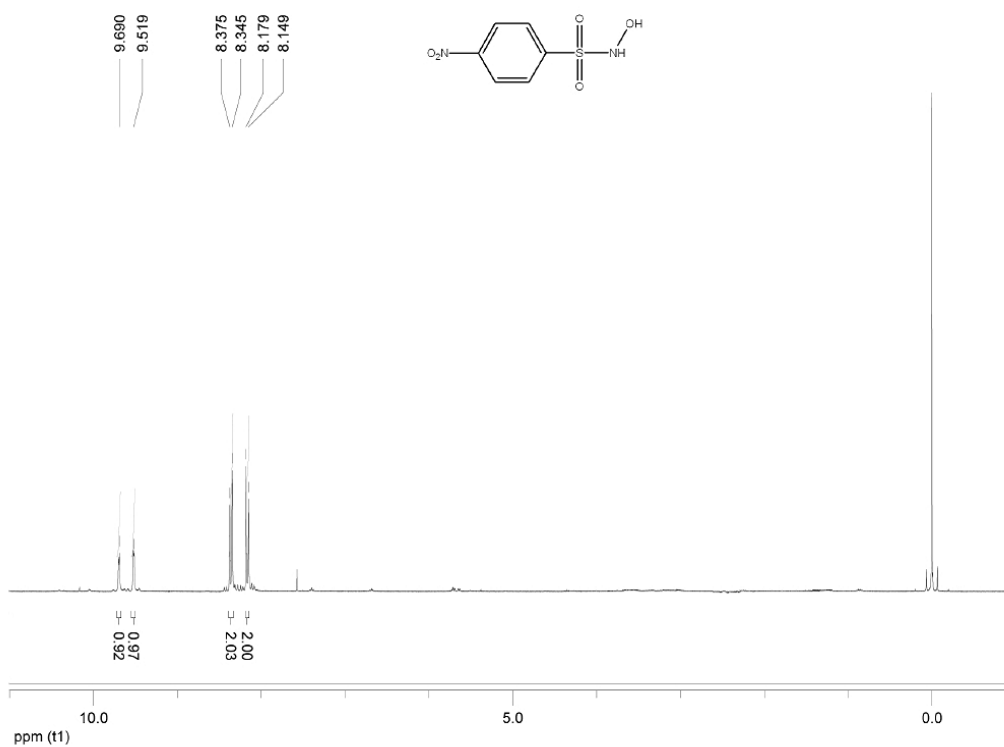

**Figure S5.**  $^1\text{H}$  NMR of N-hydroxy-4-nitrobenzenesulfonamide.

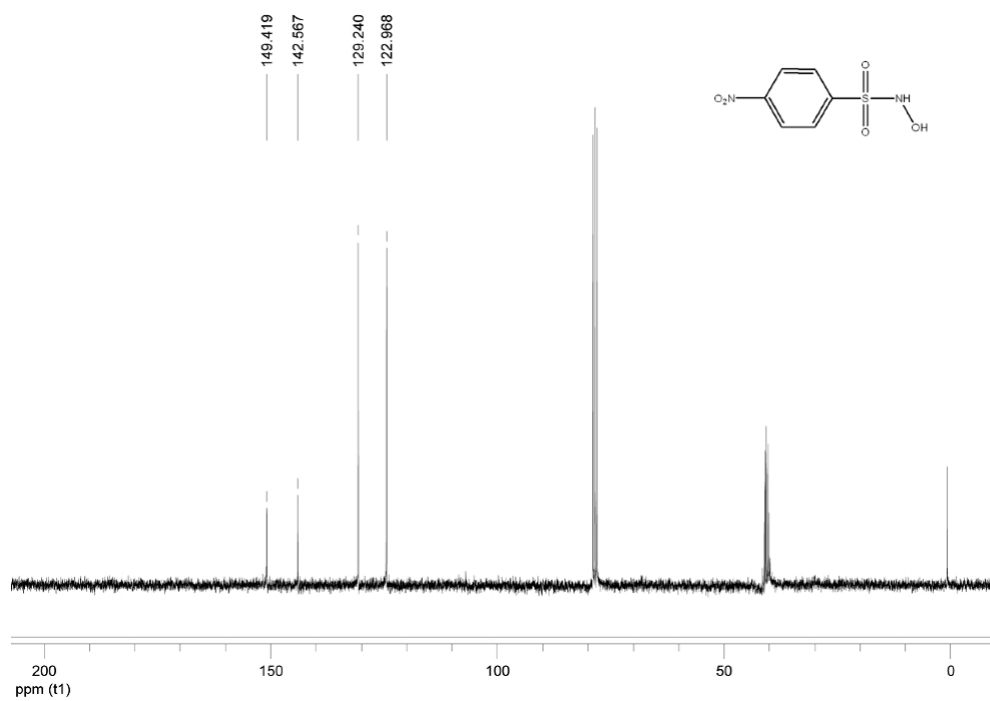

**Figure S6.**  $^{13}\text{C}$  NMR of N-hydroxy-4-nitrobenzenesulfonamide.
